# Supplementary material for: Co-crystallization of a versatile building block 4-amino- 3,5-bis(4-pyridyl)-1,2,4-triazole with R-isophthalic acids (R = –H, –NH2, –SO3H, and –COOH): polymorphism and substituent effect on structural diversity
Source: Royal Society of Chemistry journal article supplement (doi:10.1039/b811132d), 2009-01-01
Supplement: b811132d.pdf [file b811132d.pdf]

*Electronic Supplementary Information (ESI)*

**Co-crystallization of a versatile building block**

**4-amino-3,5-bis(4-pyridyl)-1,2,4-triazole with R-isophthalic acids (R = -H, -NH<sub>2</sub>, -SO<sub>3</sub>H, and -COOH): Polymorphism and substituent effect on structural diversity**

**Miao Du,\* Xiu-Juan Jiang, Xue Tan, Zhi-Hui Zhang, and Hua Cai**

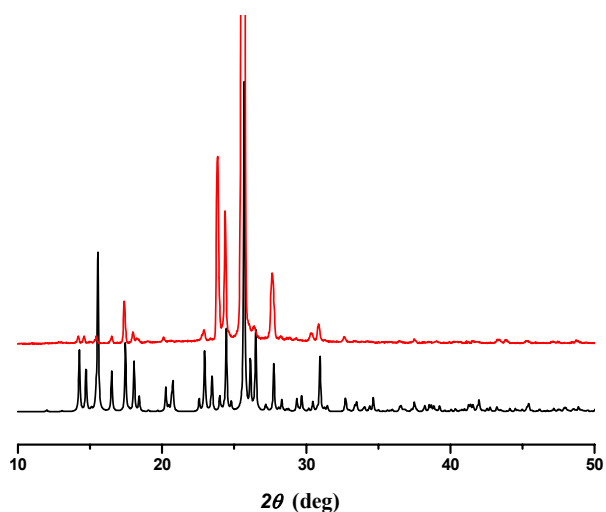

**(a)**

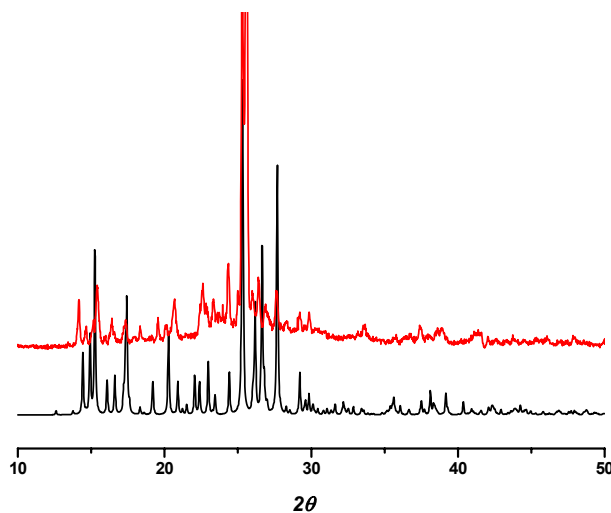

**(b)**

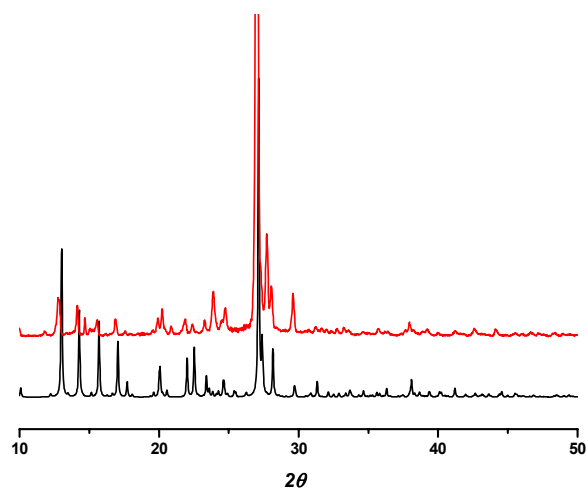

(c)

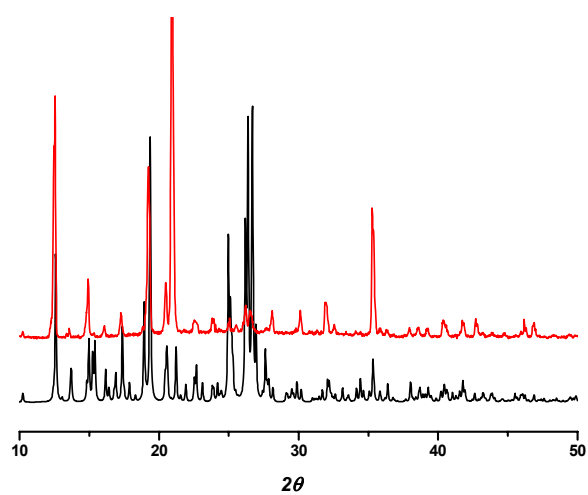

(d)

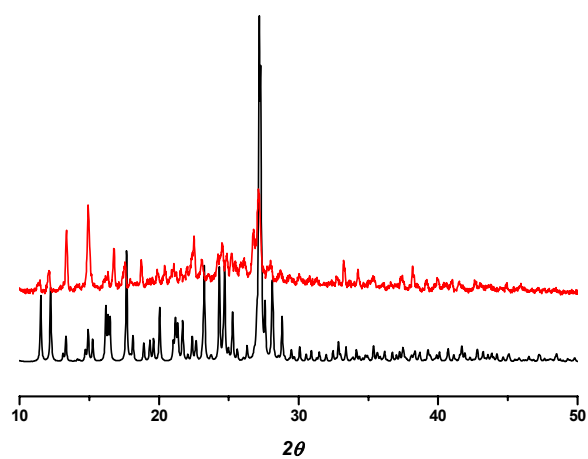

(e)

Fig. S1 Experimental (red) and calculated (black) PXR D patterns for 1–5 (from *a* to *e*).

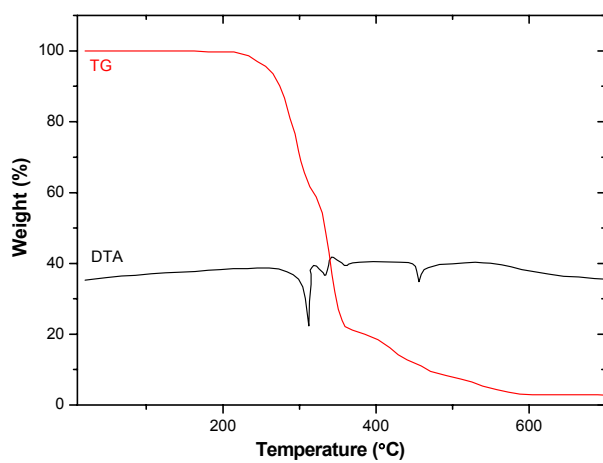

(a)

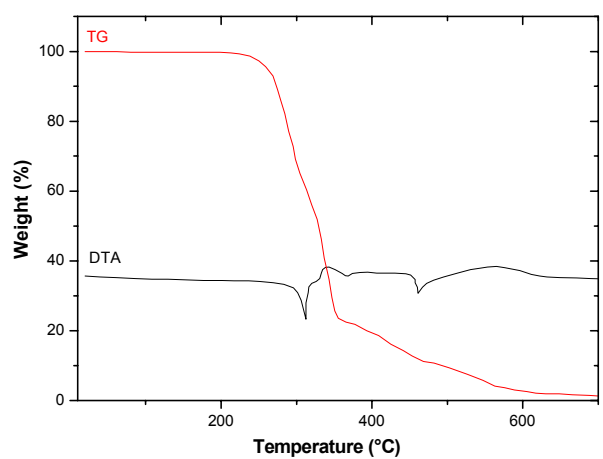

(b)

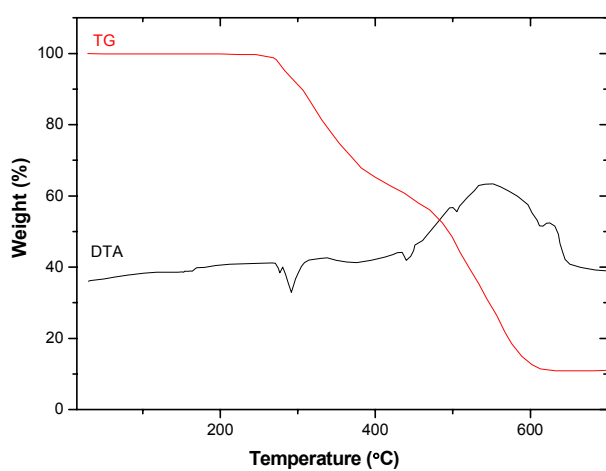

(c)

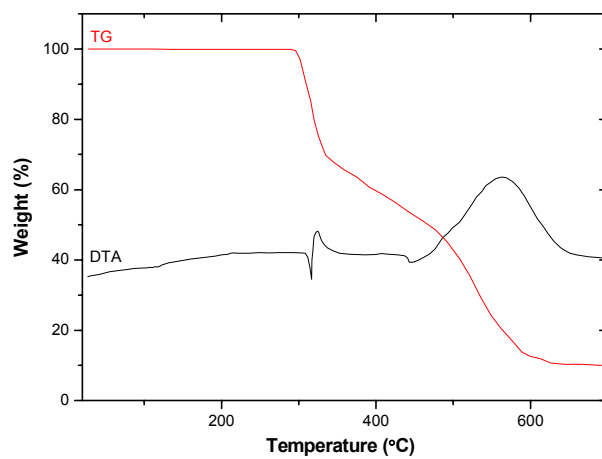

(d)

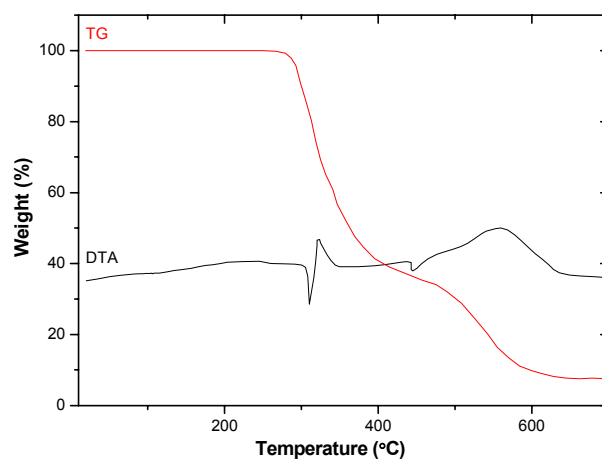

(e)

Fig. S2 TG-DTA curves for compounds 1–5 (from *a* to *e*).

**Table S1. List of the co-crystallizing products of 4-bpt with various R-H<sub>2</sub>ip under different synthetic routes**

| product                                                                                               | Route I           | Route II          | Route III         |
|-------------------------------------------------------------------------------------------------------|-------------------|-------------------|-------------------|
| 4-bpt + H <sub>2</sub> ip                                                                             | <b>1</b>          | <b>1</b>          | <b>1</b>          |
| 4-bpt + H <sub>2</sub> ip +<br>Cd(NO <sub>3</sub> ) <sub>2</sub> or Pb(NO <sub>3</sub> ) <sub>2</sub> | —                 | —                 | <b>2</b>          |
| 4-bpt + NH <sub>2</sub> -H <sub>2</sub> ip                                                            | <b>3</b>          | <b>3</b>          | unknown species A |
| 4-bpt + SO <sub>3</sub> H-H <sub>2</sub> ip                                                           | <b>4</b>          | <b>4</b>          | <b>4</b>          |
| 4-bpt + CO <sub>2</sub> H-H <sub>2</sub> ip                                                           | unknown species B | unknown species B | <b>5</b>          |
